# Supplementary material for: Capecitabine Efficacy Is Correlated with TYMP and RB1 Expression in PDX Established from Triple-Negative Breast Cancers
Source: Oxford University Press journal article supplement (doi:10.1158/1078-0432.ccr-17-3490), 2018-02-20
Supplement: 10780432ccr173490-sup-192804_2_supp_4542496_p3gtsq.docx [file 10780432ccr173490-sup-192804_2_supp_4542496_p3gtsq.docx]

|  | Residual tumors (*n*=53) | | | Treatment-naive primary tumors (*n*=919) | | |  |
| --- | --- | --- | --- | --- | --- | --- | --- |
|  | No. tumors engrafted | No. PDX established | Take rate | No.° tumors engrafted | No. PDX established | Take rate | *p* value |
| ER+ | 26 | 6 | 23% | 757 | 49 | 6% | *p*=0.007 |
| HER2+ | 9 | 2 | 22% | 34 | 9 | 26% | ns |
| TNBC | 18 | 14 | 78% | 128 | 44 | 34% | *p*=0.0006 |
| ALL | 53 | 22 | 42% | 919 | 102 | 11% | *p*<0.0001 |

**Supplementary Table 1**
